# Supplementary material
Source: HighWire-hosted journal article supplement (https://www.cmaj.ca/highwire/filestream/58242/field_highwire_adjunct_files/4/gender-kaul-online_appendix_5.pdf)
Supplement: gender-kaul-online_appendix_5.pdf [file gender-kaul-online_appendix_5.pdf]

**Appendix 5: Procedure rates, repeat events and resource use within 1 year following index emergency department visit among patients discharged from the emergency department\***

| Variable                                                         | Acute myocardial infarction |       |         | Unstable angina |       |         | Stable angina |       |         | Chest pain |        |         |
|------------------------------------------------------------------|-----------------------------|-------|---------|-----------------|-------|---------|---------------|-------|---------|------------|--------|---------|
|                                                                  | Men                         | Women | p value | Men             | Women | p value | Men           | Women | p value | Men        | Women  | p value |
| No. of discharged patients†                                      | 202                         | 127   |         | 497             | 438   |         | 1 996         | 1 732 |         | 14 041     | 13 348 |         |
| Cardiac catheterization                                          | 11.4                        | 10.2  | 0.86    | 14.7            | 8.0   | < 0.01  | 11.9          | 6.3   | < 0.01  | 2.7        | 1.5    | < 0.01  |
| Percutaneous coronary intervention                               | 2.5                         | 2.4   | 0.99    | 3.8             | 1.8   | 0.08    | 3.5           | 1.2   | < 0.01  | 0.7        | 0.3    | < 0.01  |
| Coronary artery bypass graft surgery                             | 2.5                         | 0.0   | 0.16    | 4.0             | 0.7   | < 0.01  | 2.9           | 1.1   | < 0.01  | 0.5        | 0.1    | < 0.01  |
| Repeat myocardial infarction‡                                    | 6.9                         | 4.7   | 0.48    | 1.2             | 1.8   | 0.59    | 2.0           | 1.0   | 0.02    | 0.6        | 0.3    | < 0.01  |
| No. of days to repeat myocardial infarction, median              | 21.0                        | 56.5  | 0.35    | 216.0           | 156.0 | 0.66    | 175.0         | 70.0  | 0.02    | 141.0      | 131.5  | 0.47    |
| Readmission rate at 1 yr                                         | 20.3                        | 19.7  | 0.99    | 21.5            | 23.3  | 0.53    | 21.6          | 21.2  | 0.78    | 12.6       | 17.0   | < 0.01  |
| No. of readmissions per patient, mean§                           |                             |       |         |                 |       |         |               |       |         |            |        |         |
| All                                                              | 0.4                         | 0.3   | 0.38    | 0.4             | 0.4   | 0.81    | 0.4           | 0.3   | 0.40    | 0.2        | 0.3    | < 0.01  |
| Cardiac related                                                  | 0.3                         | 0.3   | 0.68    | 0.3             | 0.3   | 0.83    | 0.3           | 0.3   | 0.14    | 0.1        | 0.1    | 0.15    |
| No. of repeat visits to emergency department per patient, ¶ mean |                             |       |         |                 |       |         |               |       |         |            |        |         |
| All                                                              | 2.4                         | 2.5   | 0.75    | 2.4             | 2.5   | 0.63    | 2.9           | 2.9   | 0.82    | 3.0        | 3.5    | < 0.01  |
| Cardiac related                                                  | 1.5                         | 1.5   | 0.98    | 1.5             | 1.4   | 0.70    | 1.5           | 1.5   | 0.90    | 1.3        | 1.2    | 0.64    |

\*Values shown are percentages of patients unless stated otherwise.

†Patients discharged after the index emergency department visit.

‡Repeat visit to the emergency department with a primary diagnosis of myocardial infarction.

§Mean number of readmissions among patients who were readmitted.

¶All patients had at least 1 repeat emergency department visit within the year following their index visit.
